# Supplementary material for: Computational Design of Myristoylated Cell Penetrating Peptides Targeting Oncogenic K-Ras.G12D at the Effector Binding Membrane Interface
Source: bioRxiv or medRxiv preprint supplement (doi:10.1101/565945), 2019-08-01

# SUPPORTING INFORMATION

## Computational Design of Myristoylated Cell Penetrating Peptides Targeting Oncogenic K-Ras.G12D at the Effector Binding Membrane Interface

Zhenlu Li<sup>1\*</sup> and Matthias Buck<sup>1,2</sup>

<sup>1</sup>Department of Physiology and Biophysics, Case Western Reserve University, School of Medicine, 10900 Euclid Avenue, Cleveland, Ohio 44106, U. S. A.

<sup>2</sup>Department of Pharmacology; Department of Neurosciences, Case Western Reserve University, School of Medicine, 10900 Euclid Avenue, Cleveland, Ohio 44106, U. S. A.

E-mail corresponding author: [zhenlu.li@case.edu](mailto:zhenlu.li@case.edu)

Figure S1: Snapshots for simulation of K-Ras at a POPC membrane doped with R9 peptides (no myr anchor).

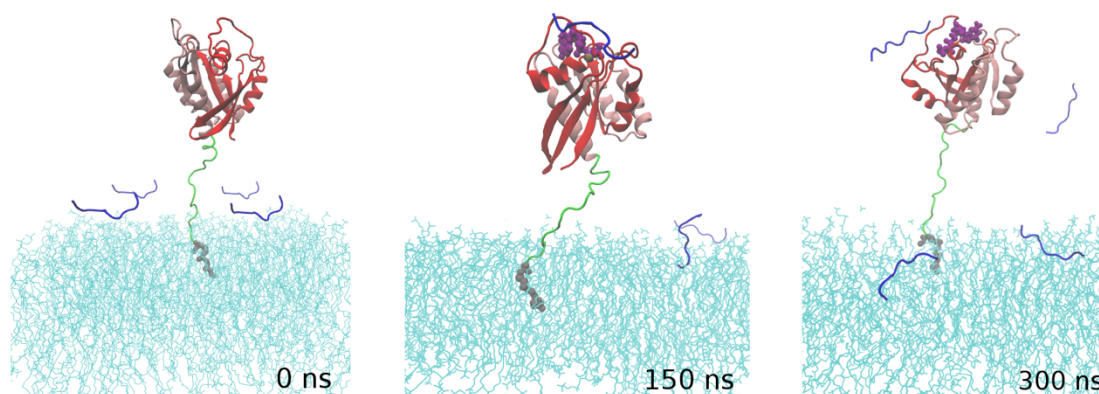

Figure S2: Simulation of K-Ras at a POPC membrane doped with far\_R9. (left) Time evolution of distance between the center of mass of the K-Ras4B core domain and the membrane center. (middle) Frequency of K-Ras4B: myr\_R9 contacts (protein residue atoms within 4 Å of myr\_R9 atoms) over the last 300 ns simulations. (right) Contour maps of  $D_z$  and  $\theta$ .

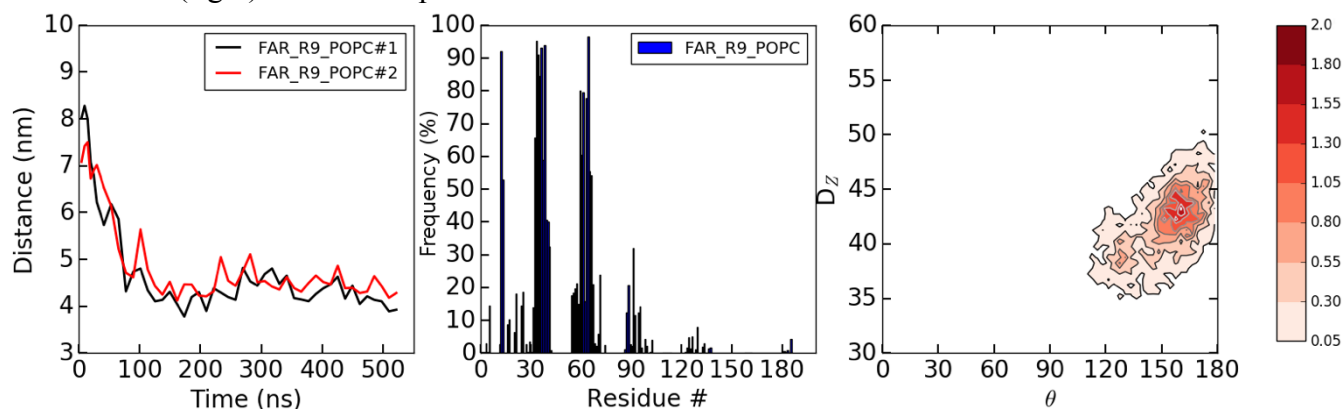

Figure S3: Simulation of K-Ras at a POPC membrane doped with myr\_CRD peptide (143-RKTFLKLA-150). (left) Time evolution of distance between the center of mass of the K-Ras4B core domain and the membrane center. (middle) Frequency of K-Ras4B: myr\_CRD peptide contacts over the last 300 ns simulations. (right) Contour maps of  $D_z$  and  $\theta$ .

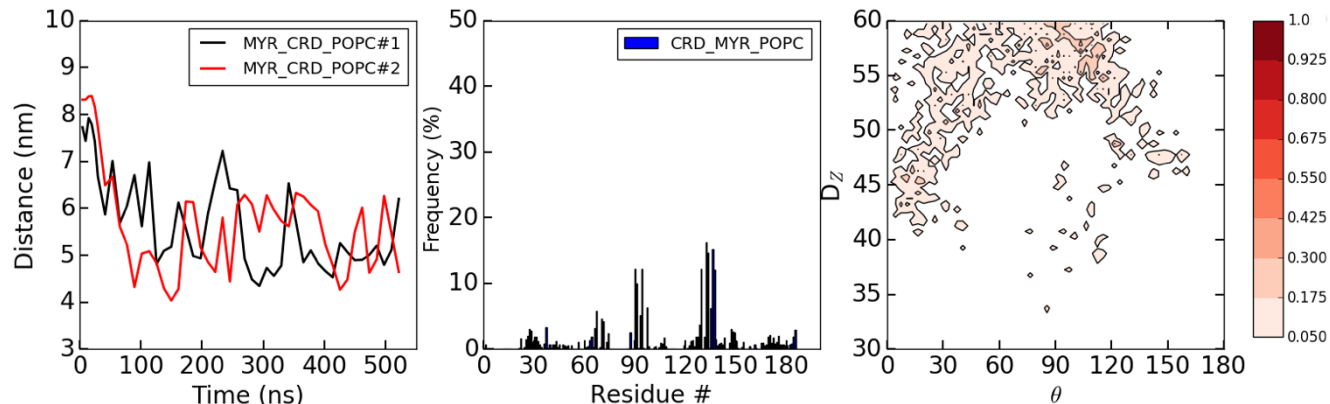

Figure S4: Simulation of K-Ras at a POPC membrane doped with myr\_Cyclorasin. (left) Time evolution of distance between the center of mass of the K-Ras4B core domain and the membrane center. (middle) Frequency of K-Ras4B: myr\_Cyclorasin contacts over the last 300 ns simulations. (right) Contour maps of  $D_z$  and  $\theta$ .

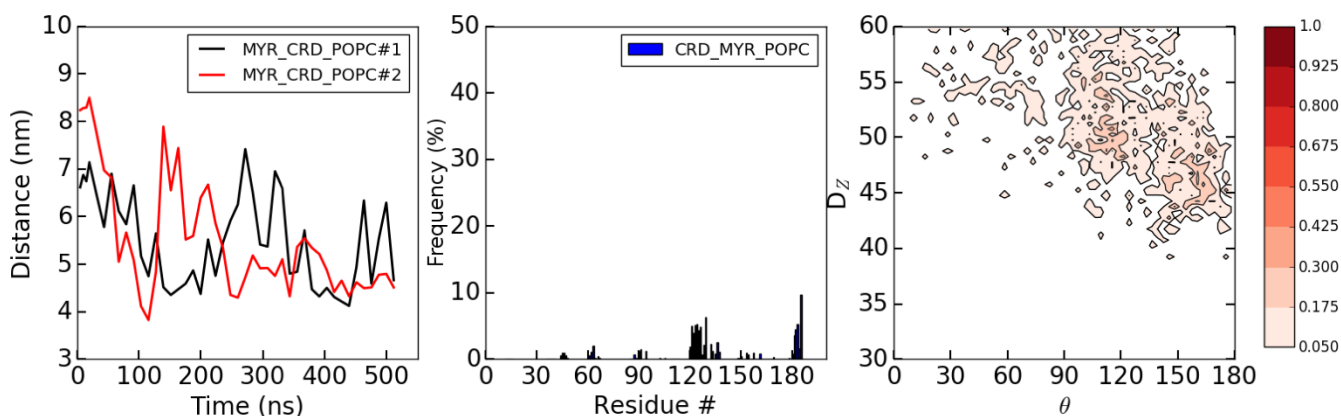

Supplement: Supplementary file [file media-1.pdf]
